# Supplementary material
Source: PubMed Central journal article supplement (PMC9117868)
Supplement: mmc4.pdf [file mmc4.pdf]

## Appendix: Pa-COVID-19 Study Group

### <sup>(1)</sup> Charité Universitätsmedizin Berlin, DE 10117

**Members:** Mirja Mittermaier<sup>(1)</sup>; Tilman Lingscheid<sup>(1)</sup>; Pinkus Tober-Lau<sup>(1)</sup>; Lil Meyer-Arndt<sup>(1)</sup>; Sascha S.Haenel <sup>(1)</sup>; Laure Bosquillon de Jarcey <sup>(1)</sup>; Moritz Pfeiffer <sup>(1)</sup>; Miriam S. Stegemann <sup>(1)</sup>; Robert Roehle <sup>(1)</sup>; Janine Wiebach <sup>(1)</sup>; Thomas Zoller <sup>(1)</sup>; Holger Müller-Redetzky <sup>(1)</sup>; Alexander Uhrig <sup>(1)</sup>; Felix Balzer <sup>(1)</sup>; Christof von Kalle <sup>(1)</sup>; Sascha Treskatsch <sup>(1)</sup>; Stefan Angermair <sup>(1)</sup>; Julia Heeschen <sup>(1)</sup>; Linda Jürgens <sup>(1)</sup>; Malte Kleinschmidt <sup>(1)</sup>; Sophy Denker <sup>(1)</sup>; Christoph Ruwwe-Glösenkamp <sup>(1)</sup>; Bettina Temmesfeld-Wollbrück <sup>(1)</sup>; Katrin M. Heim <sup>(1)</sup>; Dirk Schürmann <sup>(1)</sup>; Andreas Hocke <sup>(1)</sup>; Bastian Opitz <sup>(1)</sup>; Belén Millet Pascual-Leone <sup>(1)</sup>; Rosa C. Schuhmacher <sup>(1)</sup>; Nadine Olk <sup>(1)</sup>; David Hillus <sup>(1)</sup>; Felix Machleidt <sup>(1)</sup>; Sebastian Albus <sup>(1)</sup>; Felix Bremer <sup>(1)</sup>; Carmen Garcia <sup>(1)</sup>; Philipp Knape <sup>(1)</sup>; Philipp M <sup>(1)</sup>; Krause Liron Lechtenberg <sup>(1)</sup>; Yaosi Li <sup>(1)</sup>; Panagiotis Pergantis <sup>(1)</sup>; Teresa Ritter <sup>(1)</sup>; Berna Yedikat <sup>(1)</sup>; Christian Zobel <sup>(1)</sup>; Friederike L. Hefele <sup>(1)</sup>; Ute Kellermann <sup>(1)</sup>; Mariana Schürmann <sup>(1)</sup>; Lisa-Marie Wackernagel <sup>(1)</sup>; Anne Wetzel <sup>(1)</sup>; Daniel Grund <sup>(1)</sup>; Jens K. Haumesser <sup>(1)</sup>; Johannes Hodes <sup>(1)</sup>; Johannes Rein <sup>(1)</sup>; Peter Radünzel <sup>(1)</sup>; Astrid Breitbart <sup>(1)</sup>; Sergej Münzenberg <sup>(1)</sup>; Dominik Soll <sup>(1)</sup>; Tamar Zhamurashvili <sup>(1)</sup>; Florian Alius <sup>(1)</sup>; Tim Andermann <sup>(1)</sup>; Thomas Cronen <sup>(1)</sup>; Simon Fraumann <sup>(1)</sup>; Nikolaj Frost <sup>(1)</sup>; Dominik Geus <sup>(1)</sup>; Gisele J. Godzick-Njomgang <sup>(1)</sup>; Anne Herholz <sup>(1)</sup>; Vera Hermanns <sup>(1)</sup>; Moritz Hilbrandt <sup>(1)</sup>; Till Jacobi <sup>(1)</sup>; Ye-Ji Kim <sup>(1)</sup>; Elena Madlung <sup>(1)</sup>; Luise Martin <sup>(1)</sup>; Nikolai Menner <sup>(1)</sup>; Agata Mikolajewska <sup>(1)</sup>; Luisa Mrziglod <sup>(1)</sup>; Nadine Muller <sup>(1)</sup>; Michaela Niebank <sup>(1)</sup>; Eva Pappe <sup>(1)</sup>; Frieder Pfäfflin <sup>(1)</sup>; Lennart Pfannkuch <sup>(1)</sup>; Matthias Raspe <sup>(1)</sup>; Nicola Reck <sup>(1)</sup>; Anne Ritter <sup>(1)</sup>; Laura K. Schmalbrock <sup>(1)</sup>; Fridolin Steinbeis <sup>(1)</sup>; Christoph Tabeling <sup>(1)</sup>; Markus Vogtmann <sup>(1)</sup>; Susanne Weber <sup>(1)</sup>; Markus Brack <sup>(1)</sup>; Matthias Felten <sup>(1)</sup>; Sein Schmidt <sup>(1)</sup>; Maria Rönnefarth <sup>(1)</sup>; Georg Schwanitz <sup>(1)</sup>; Alexander Krannich <sup>(1)</sup>; Saskia Zvorc <sup>(1)</sup>; Uwe D. Behrens <sup>(1)</sup>; Lucie Kretzler <sup>(1)</sup>; Linna Li;

Isabelle Wirsching <sup>(1)</sup>; Chantip Dang-Heine <sup>(1)</sup>; Michael Hummel <sup>(1)</sup>; Dana Briesemeister <sup>(1)</sup>;  
Denise Treue <sup>(1)</sup>; Martin Möckel <sup>(1)</sup>; Samuel Knauß <sup>(1)</sup>; Matthias Endres <sup>(1)</sup>; Claudia Spies <sup>(1)</sup>;  
Steffen Weber <sup>(1)</sup>; Carstens Jan M. Kruse <sup>(1)</sup>; Daniel Zickler <sup>(1)</sup>; Andreas Edel <sup>(1)</sup>; Britta Stier <sup>(1)</sup>;  
Philipp Enghard <sup>(1)</sup>; Roland Körner <sup>(1)</sup>; Kai-Uwe Eckardt <sup>(1)</sup>; Lucas Elbert <sup>(1)</sup>; Christopher  
Neumann <sup>(1)</sup>; Marius A. Eckart <sup>(1)</sup>; Thuy N. Pham <sup>(1)</sup>; Solveig Schönberger <sup>(1)</sup>; Alexander Wree  
<sup>(1)</sup>; Frank Tacke <sup>(1)</sup>; Josef Mang <sup>(1)</sup>; Nadia A. de Vries <sup>(1)</sup>; Marcel Wittenberg <sup>(1)</sup>; Jana Riecke <sup>(1)</sup>
